# Supplementary material
Source: publisher site journal article supplement (https://www.dovepress.com/article/supplementary_file/587596/587596%20Revised%20Supporting%20information.docx)
Supplement: Supplementary file 1 [file 587596%20Revised%20Supporting%20information.docx]

**Supporting information**


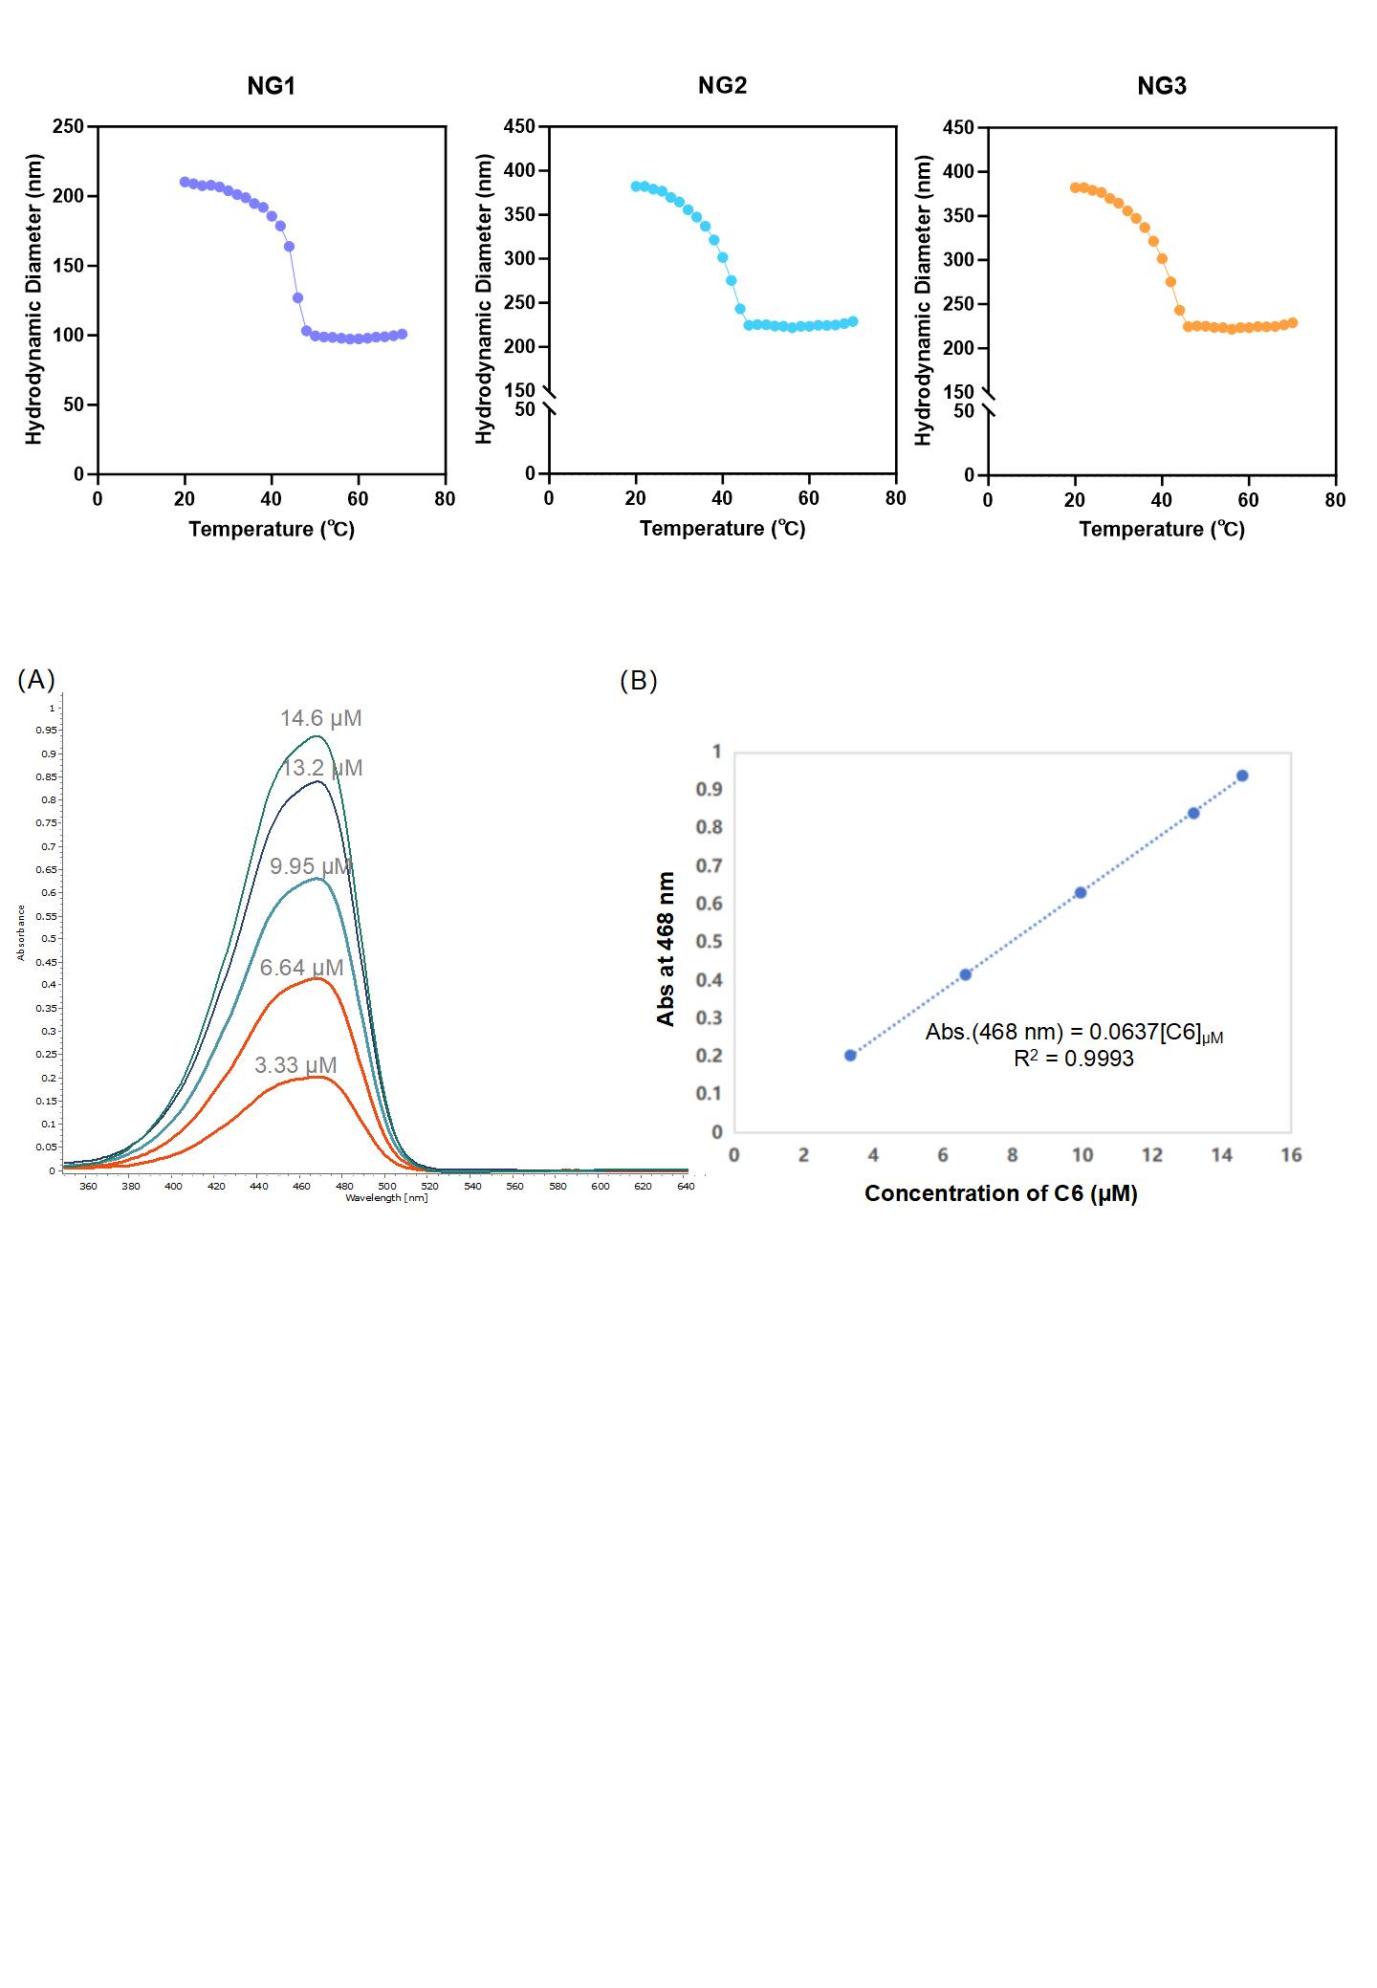


**Figure S1.** (A) Uv-vis spectra of C6 in DMSO with different concentrations (right) and calibration curve of C6 in DMSO according to the characteristic band at 468 nm (left).


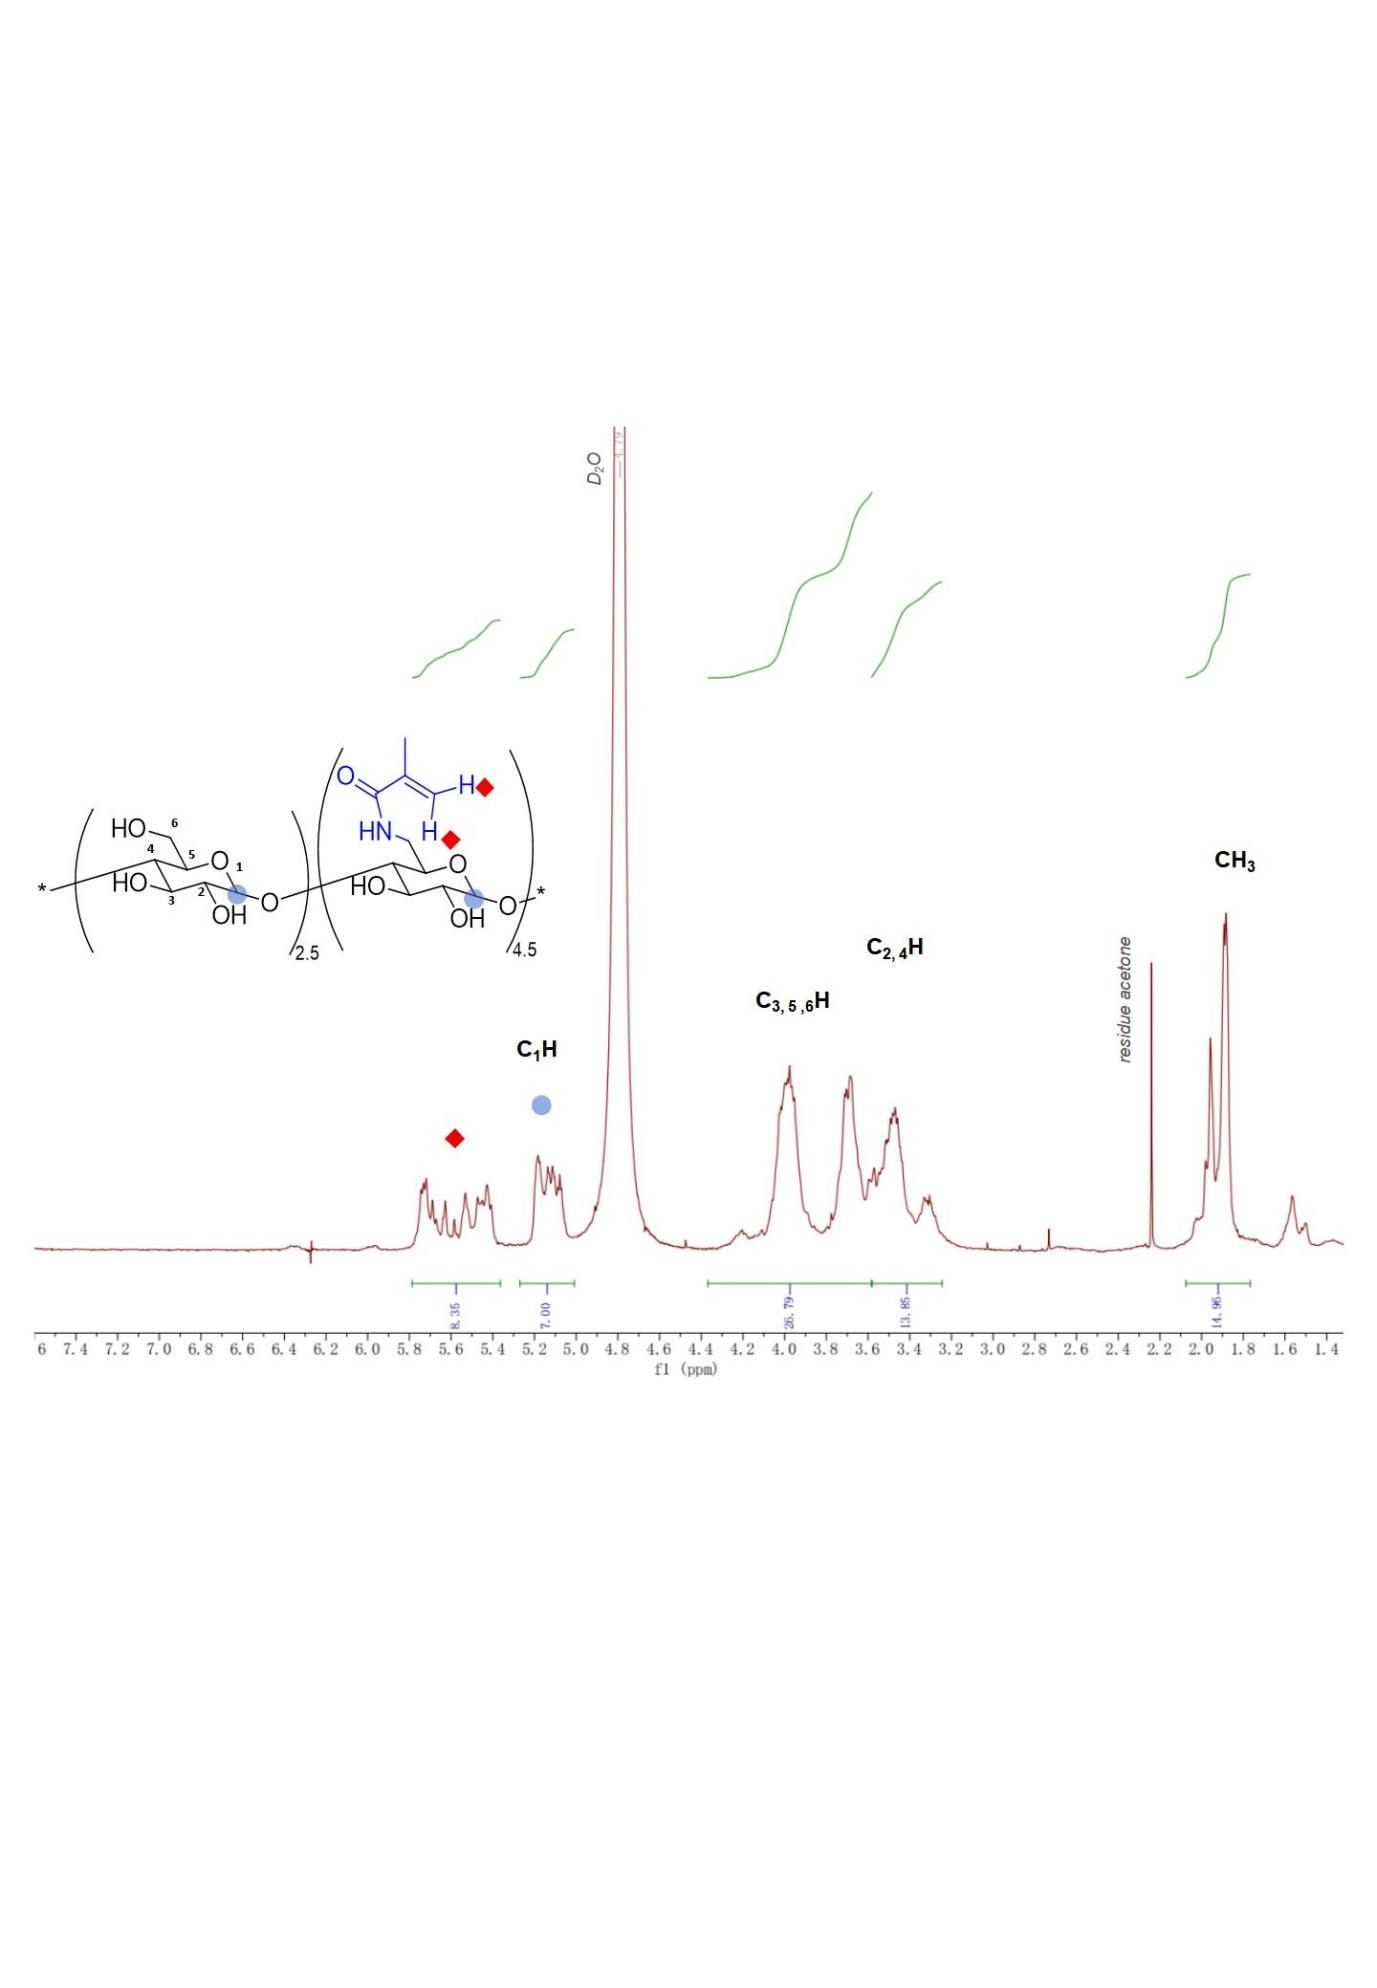


**Figure S2**. 1H NMR (400 mHz, D2O) of MaβCD.


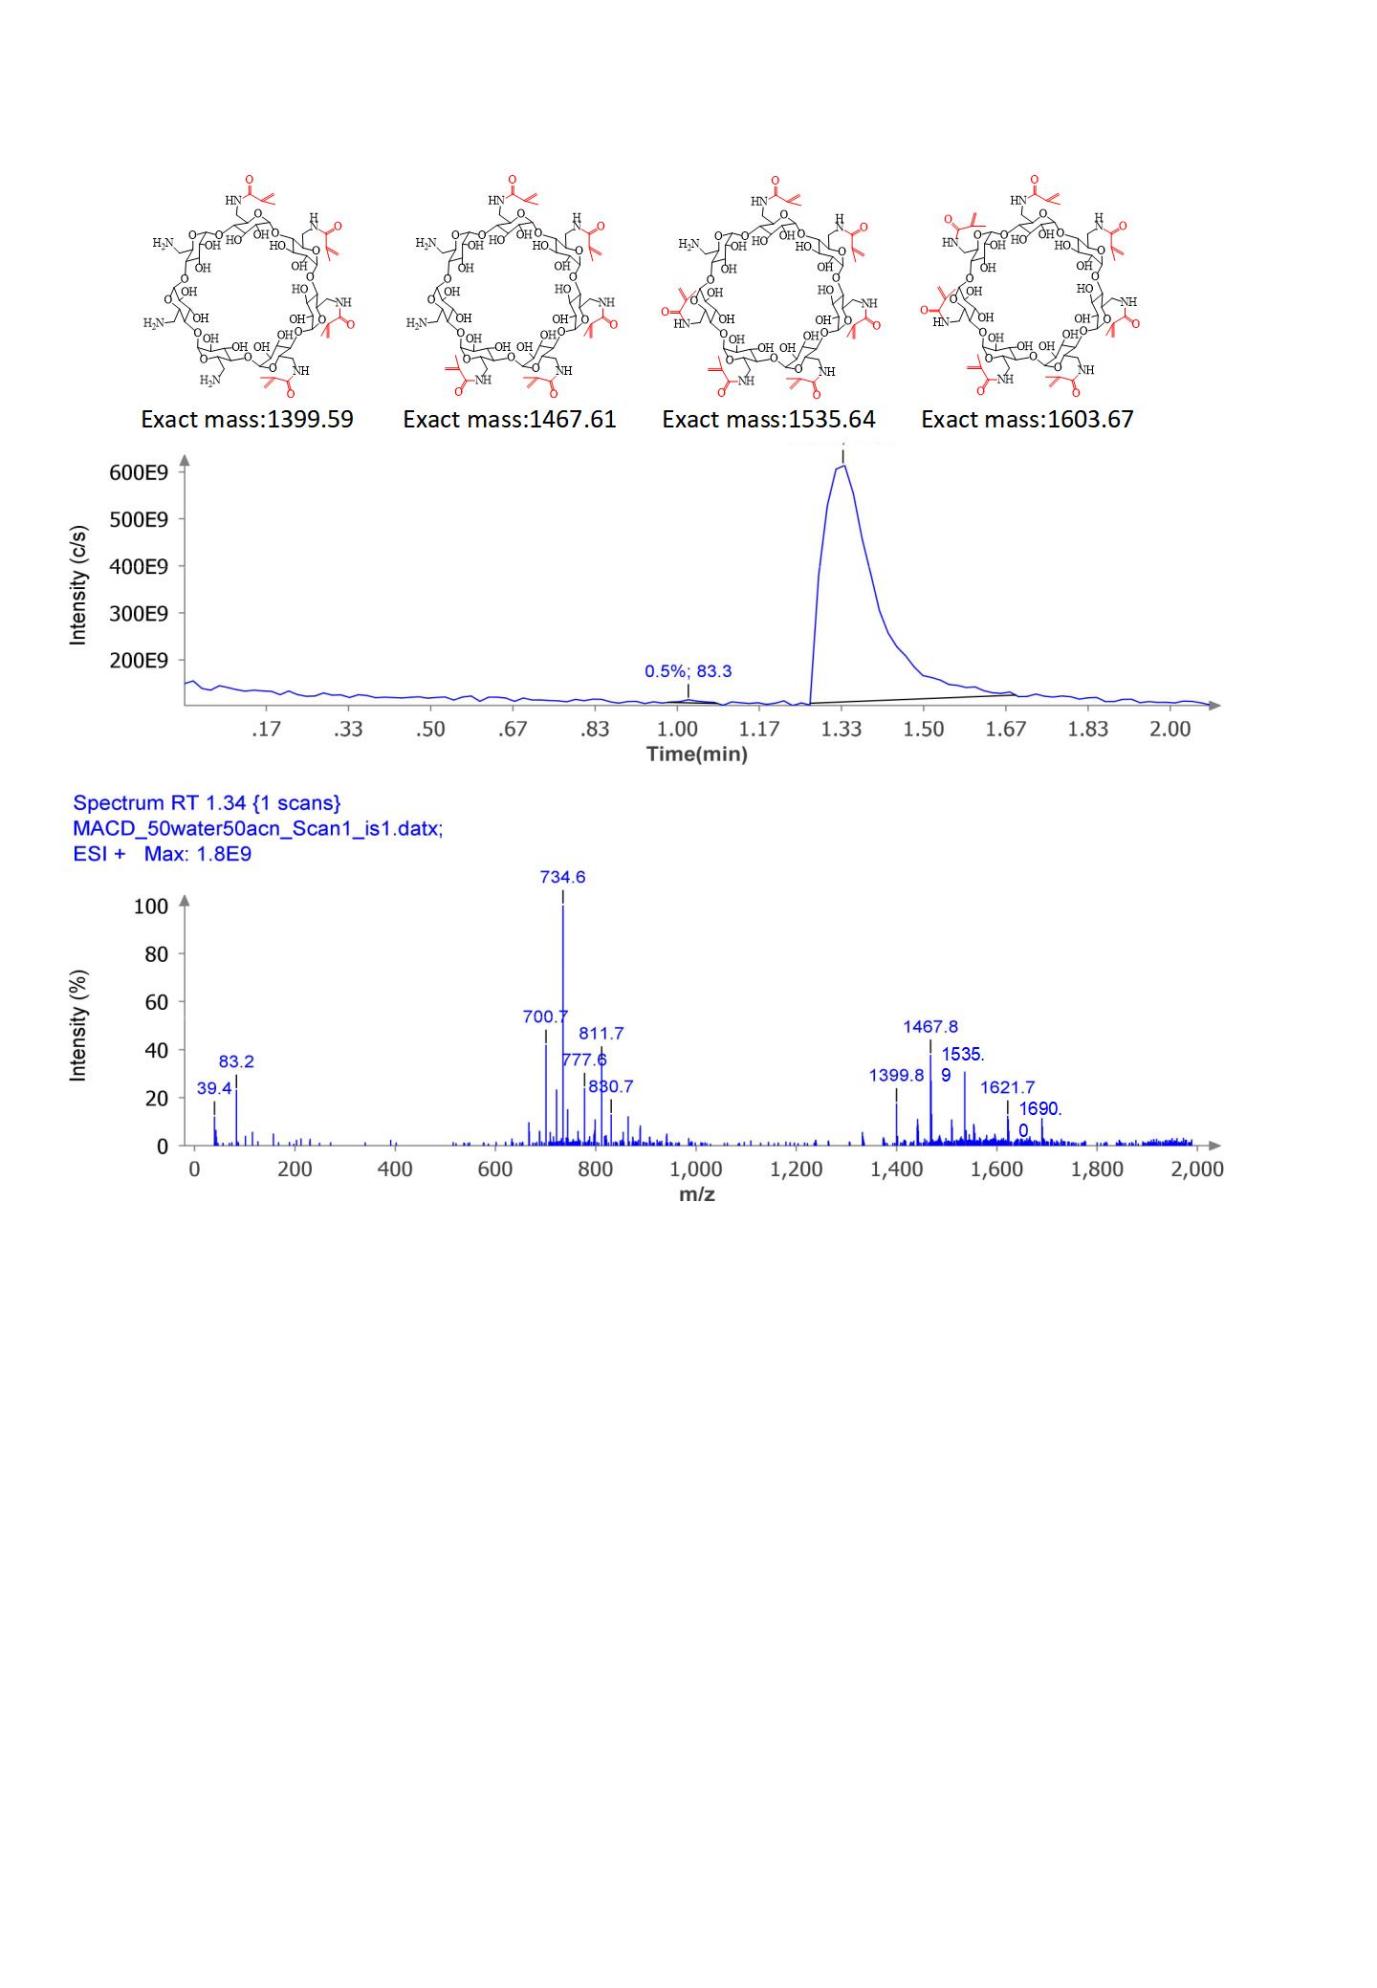
**Figure S3**. LC-MS spectrometer of MAβCD (ESI+ mode, MeCN/H2O=50/50).


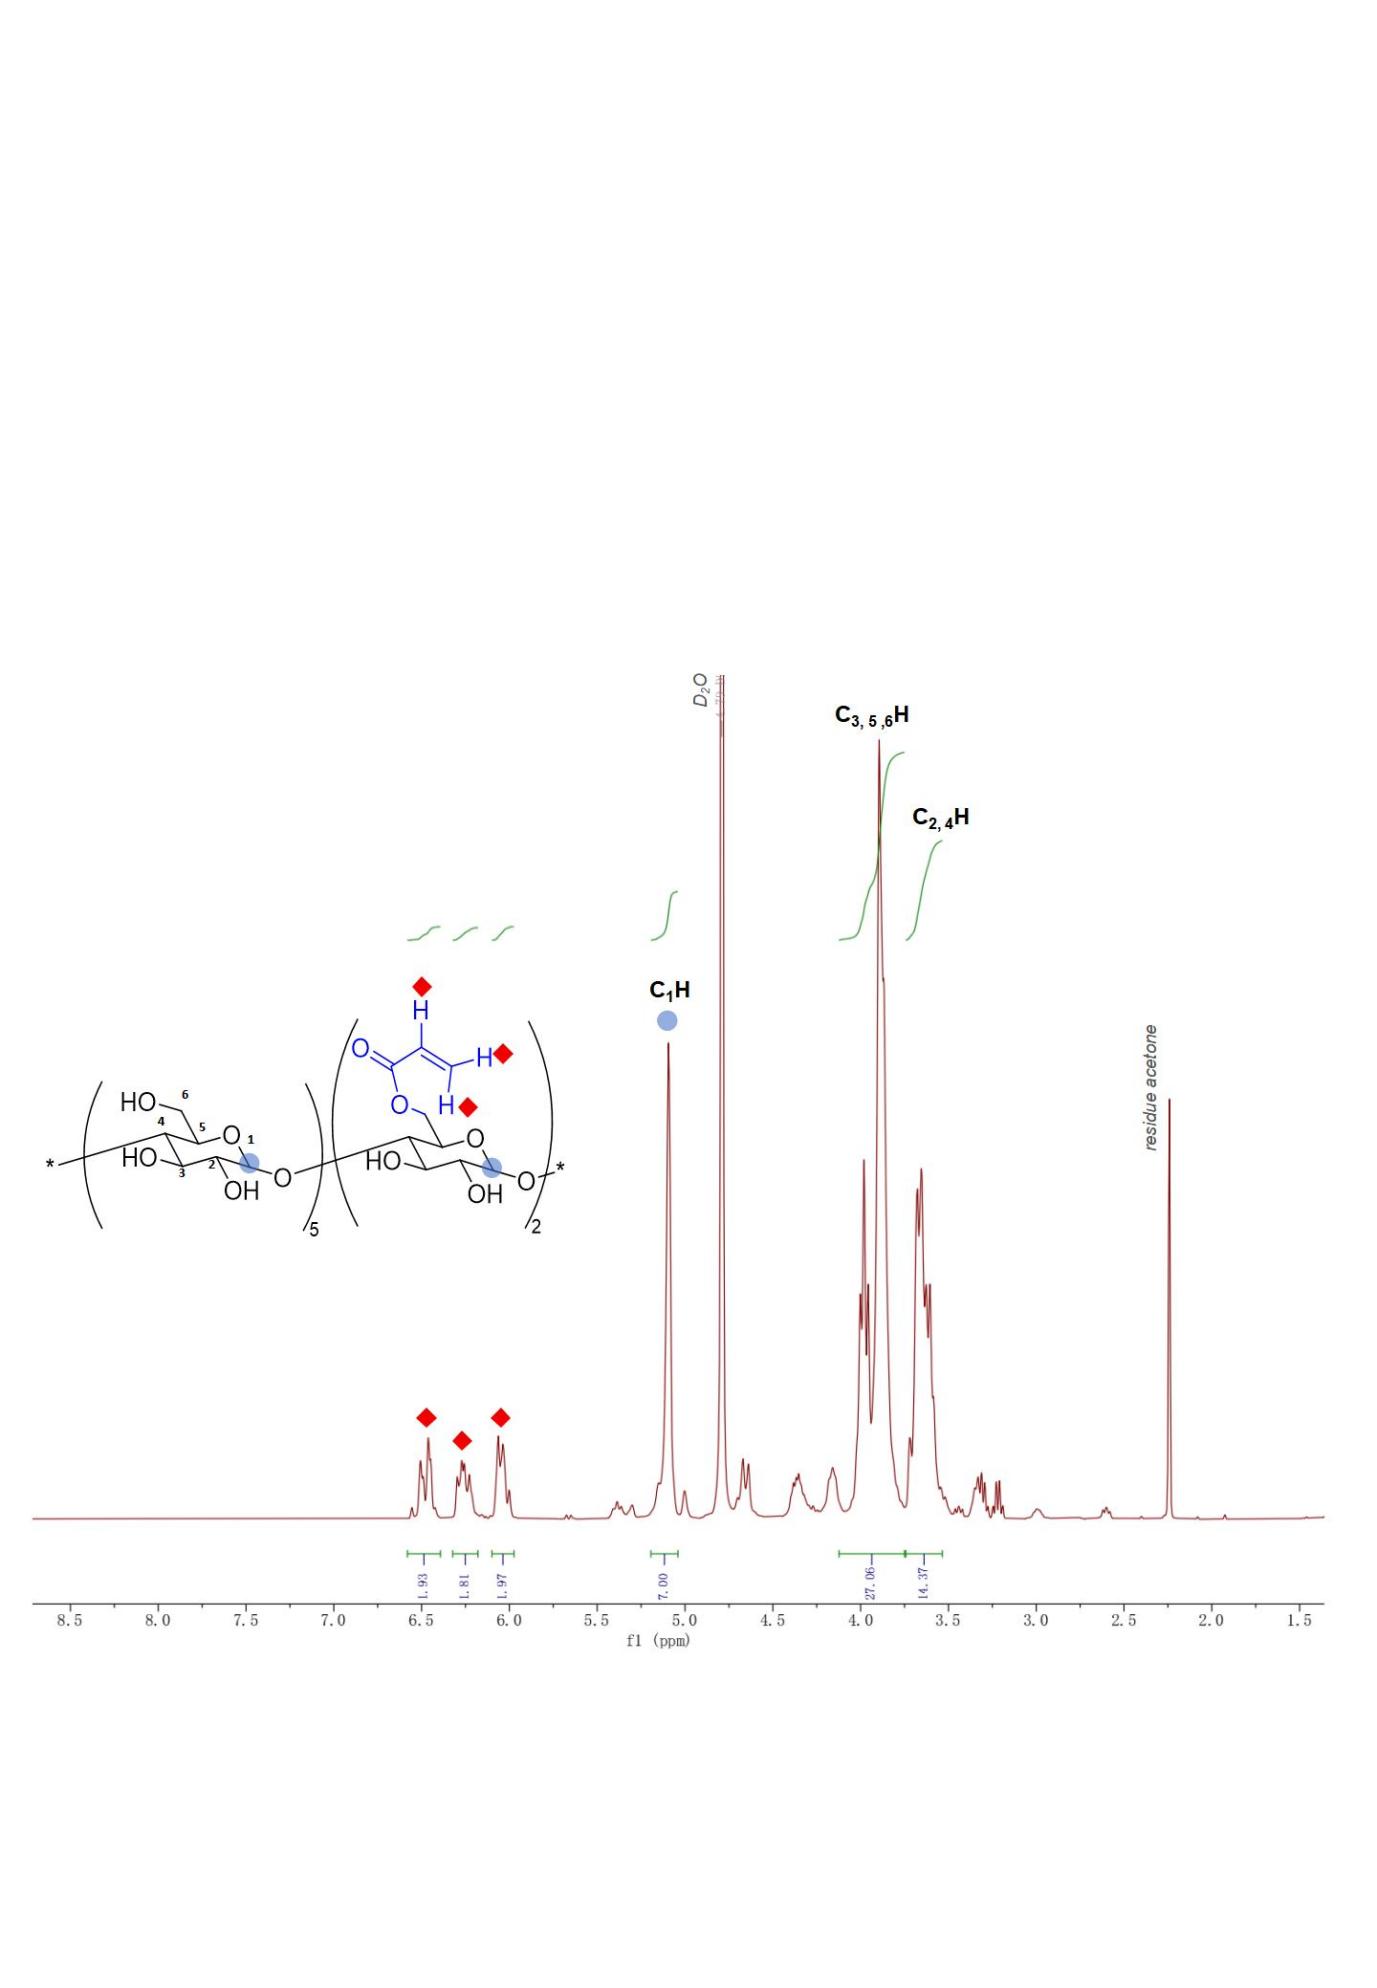


**Figure S4.** 1H NMR (400 mHz, D2O) of ACβCD.


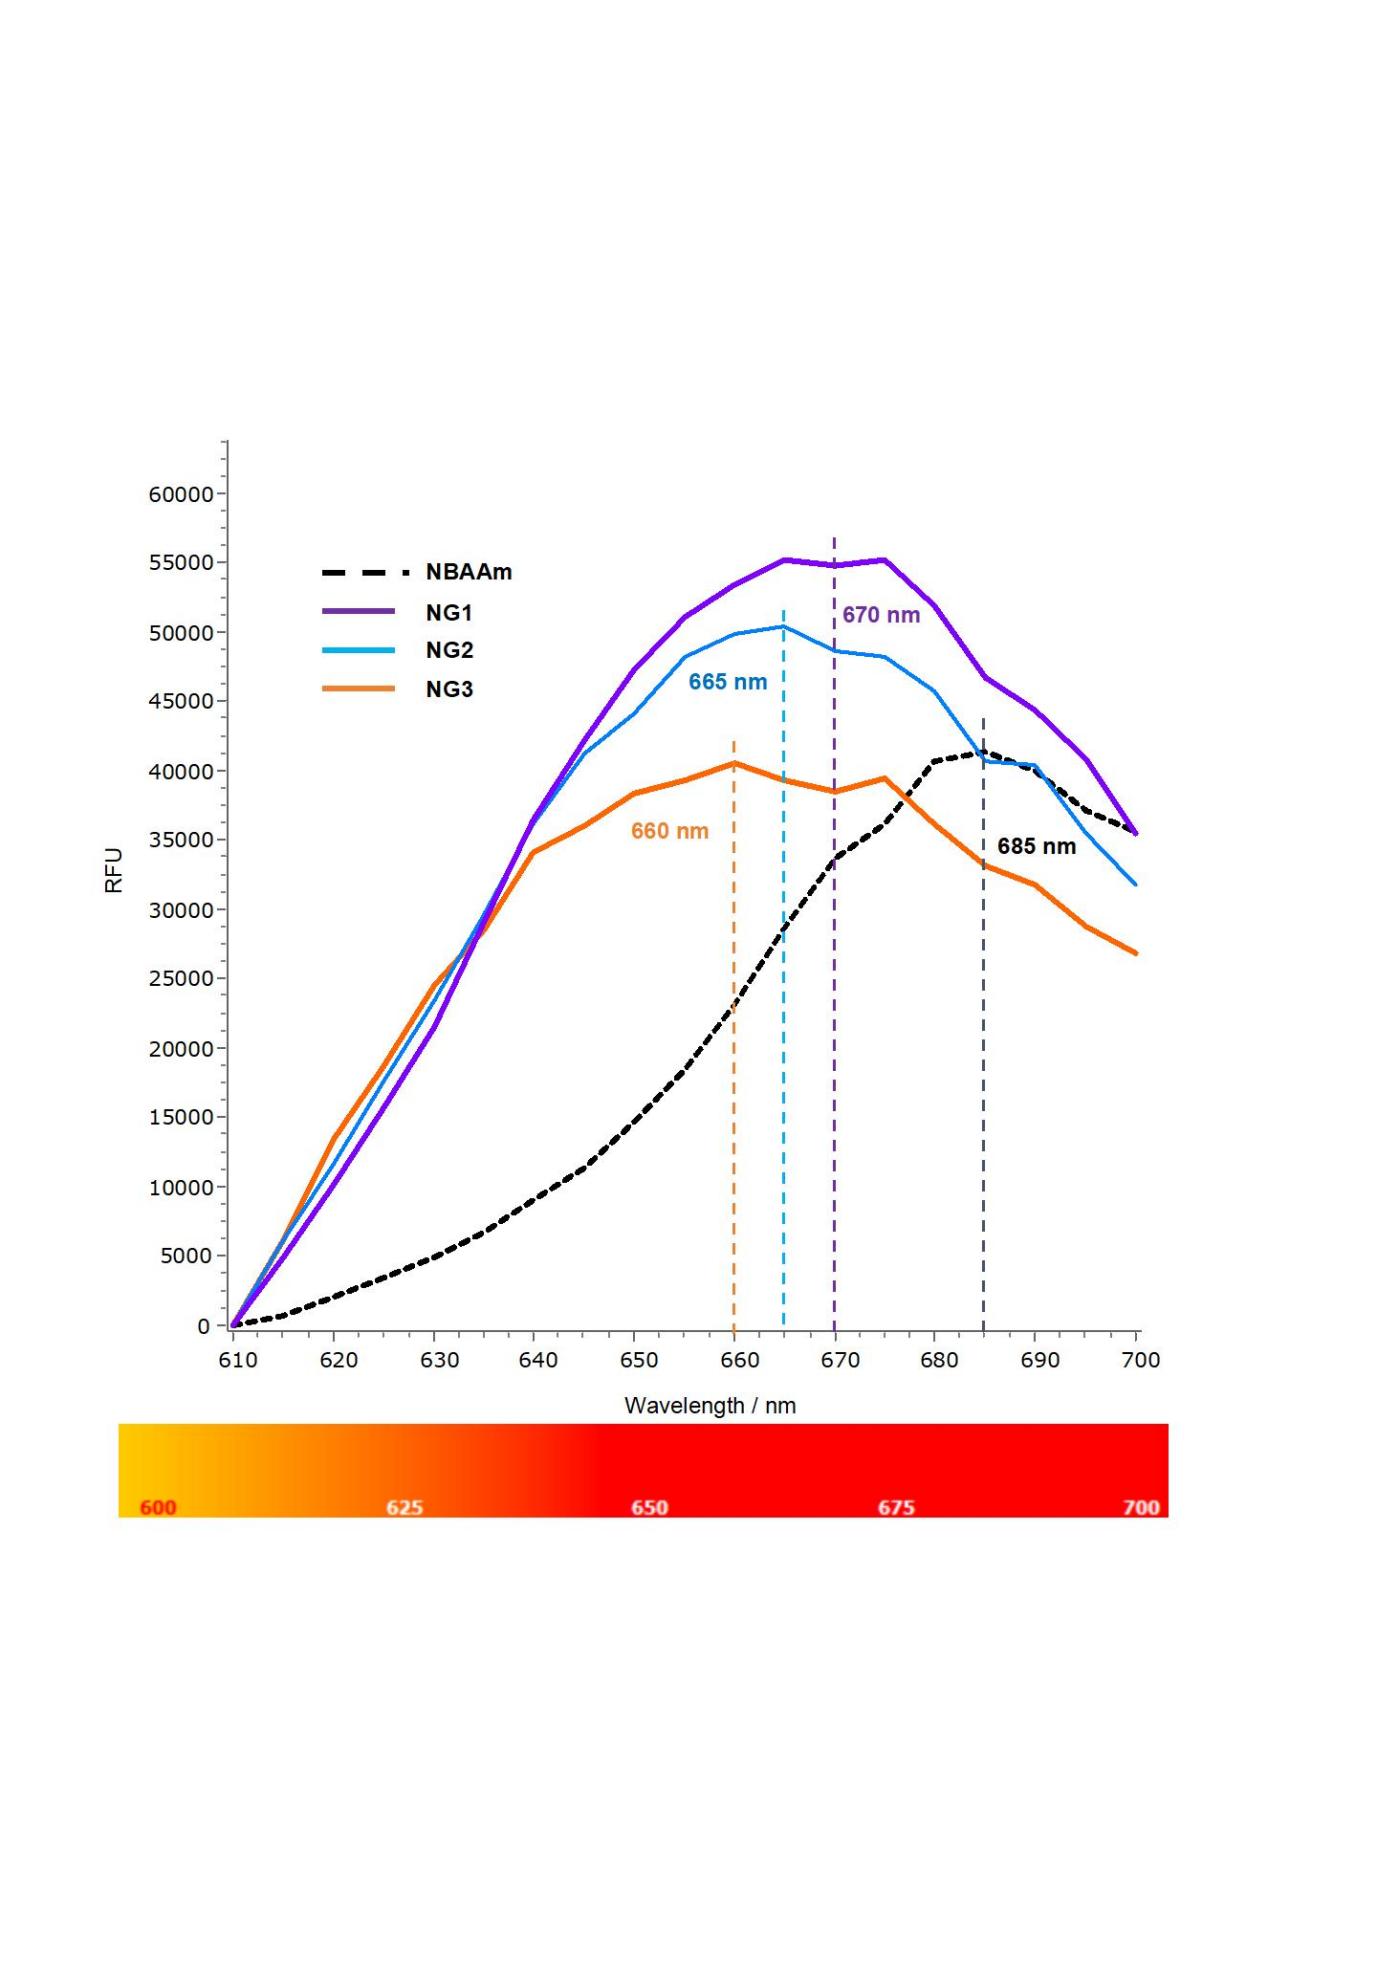


**Figure S5.** Fluorescence emission spectra of NB-labeled CD-nGel and free NBAAm in H2O (excitation wavelength = 580 nm).


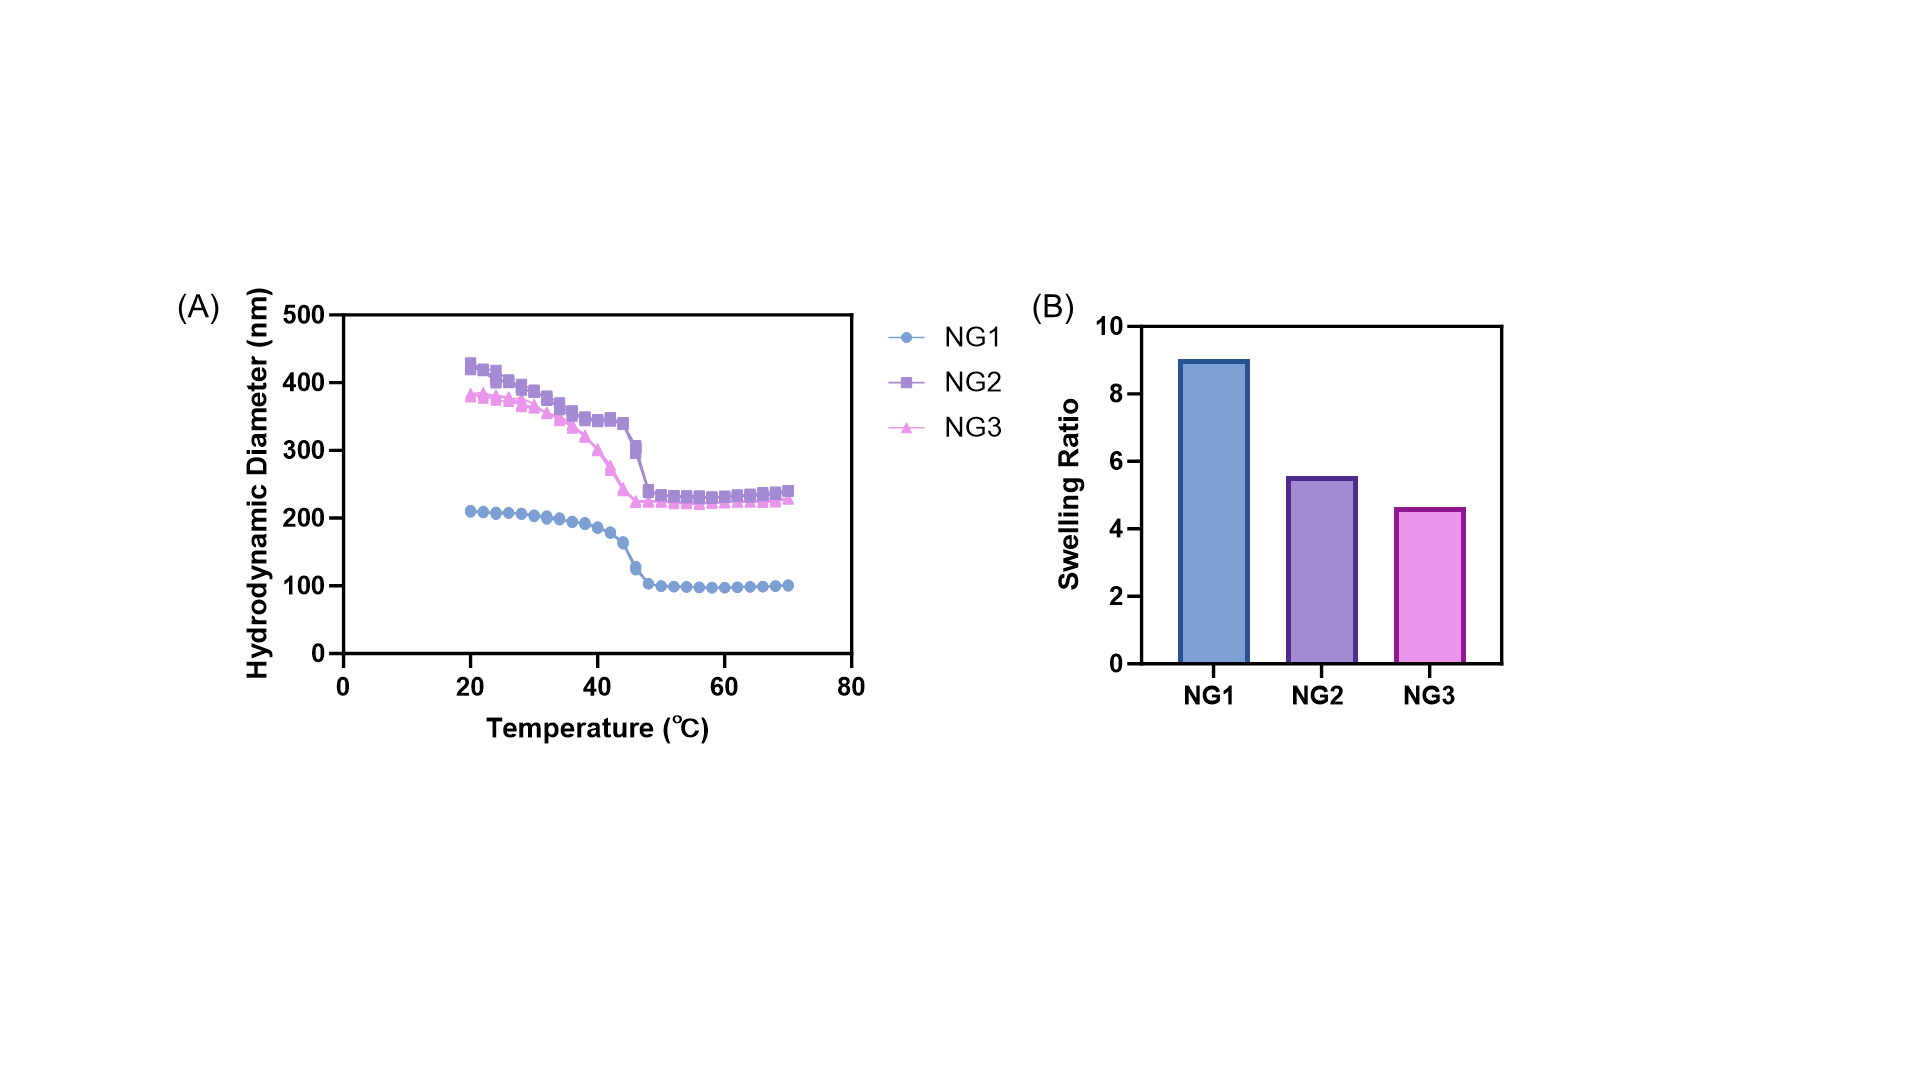


**Figure S6.** (A) VPTT measurements of CD-nGels over a temperature range of 20–70 °C. (B) Volumetric swelling ratio of each CD-nGels calculated by comparing the volumes in swollen (20 °C) and collapsed state (70°C).


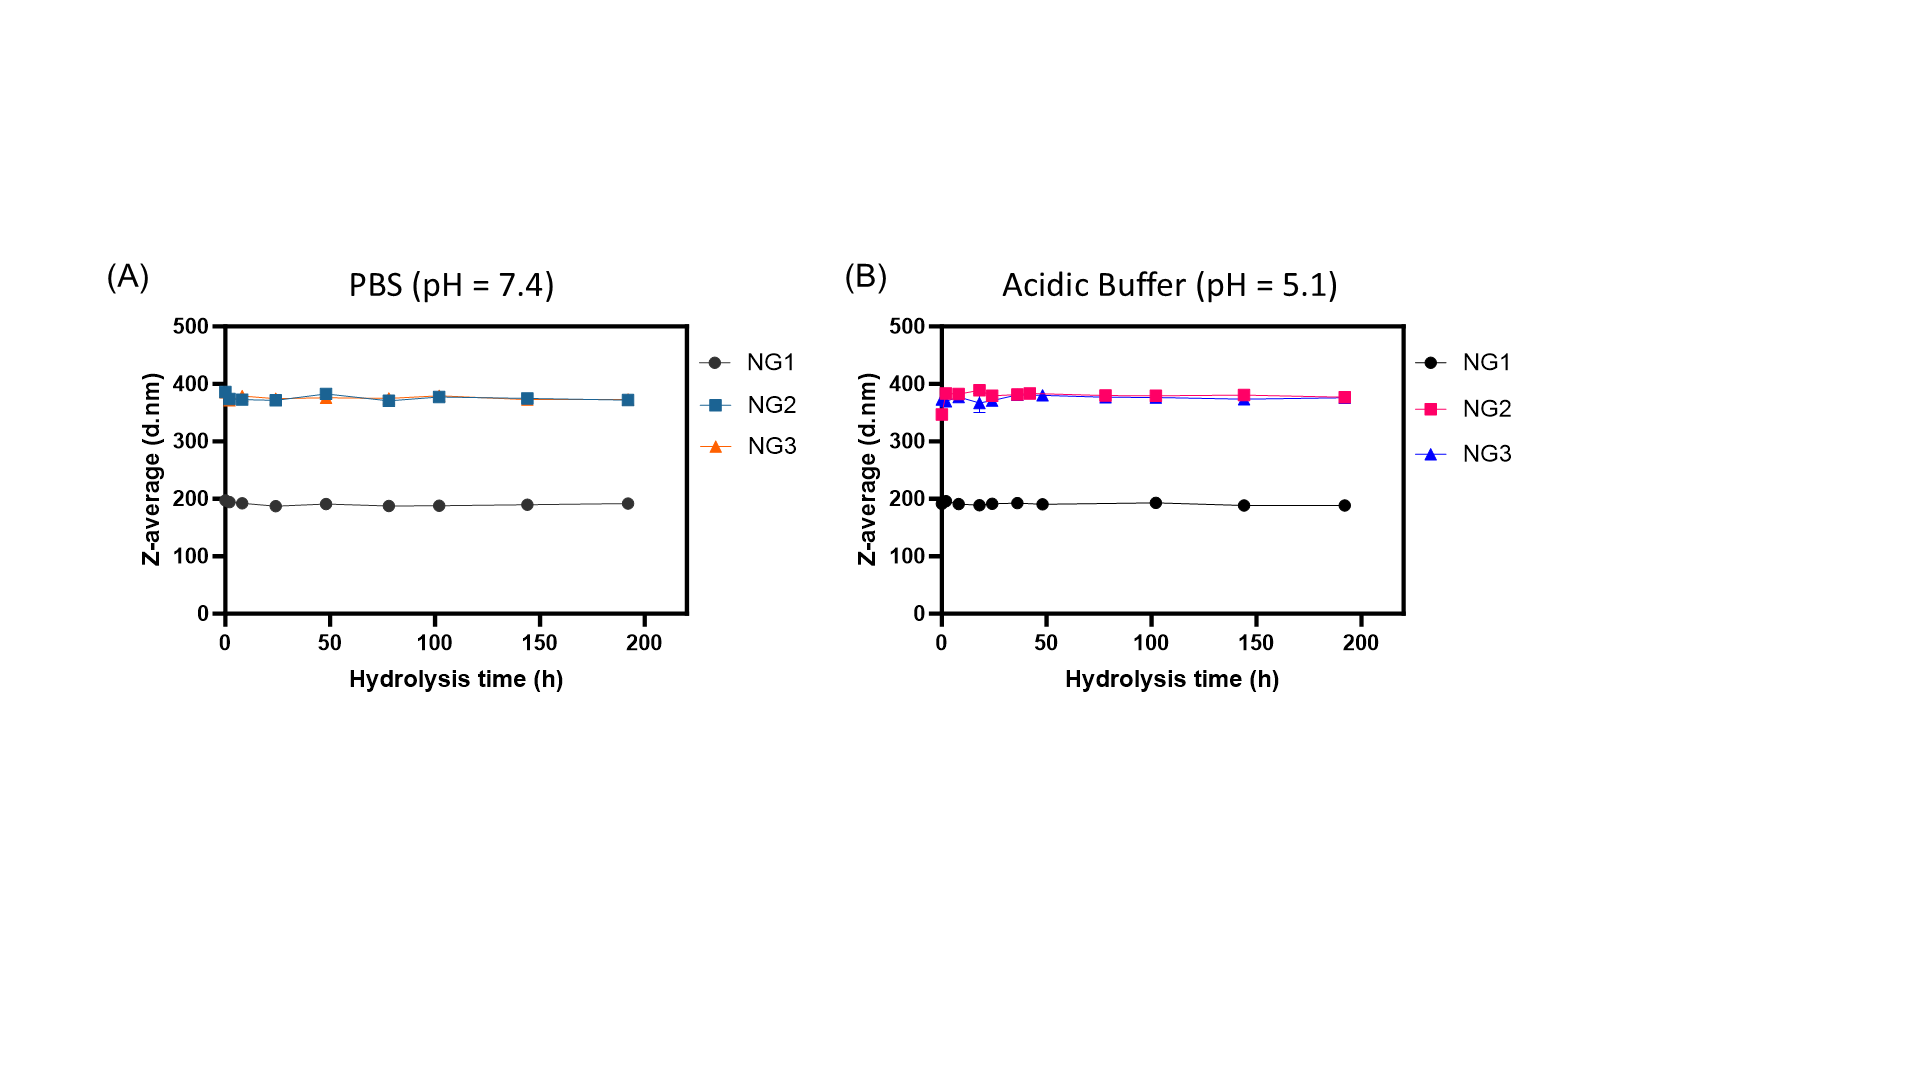


**Figure S7.** The average Dh of all three CD-nGels over time under (A) physiological and (B) acidic conditions.


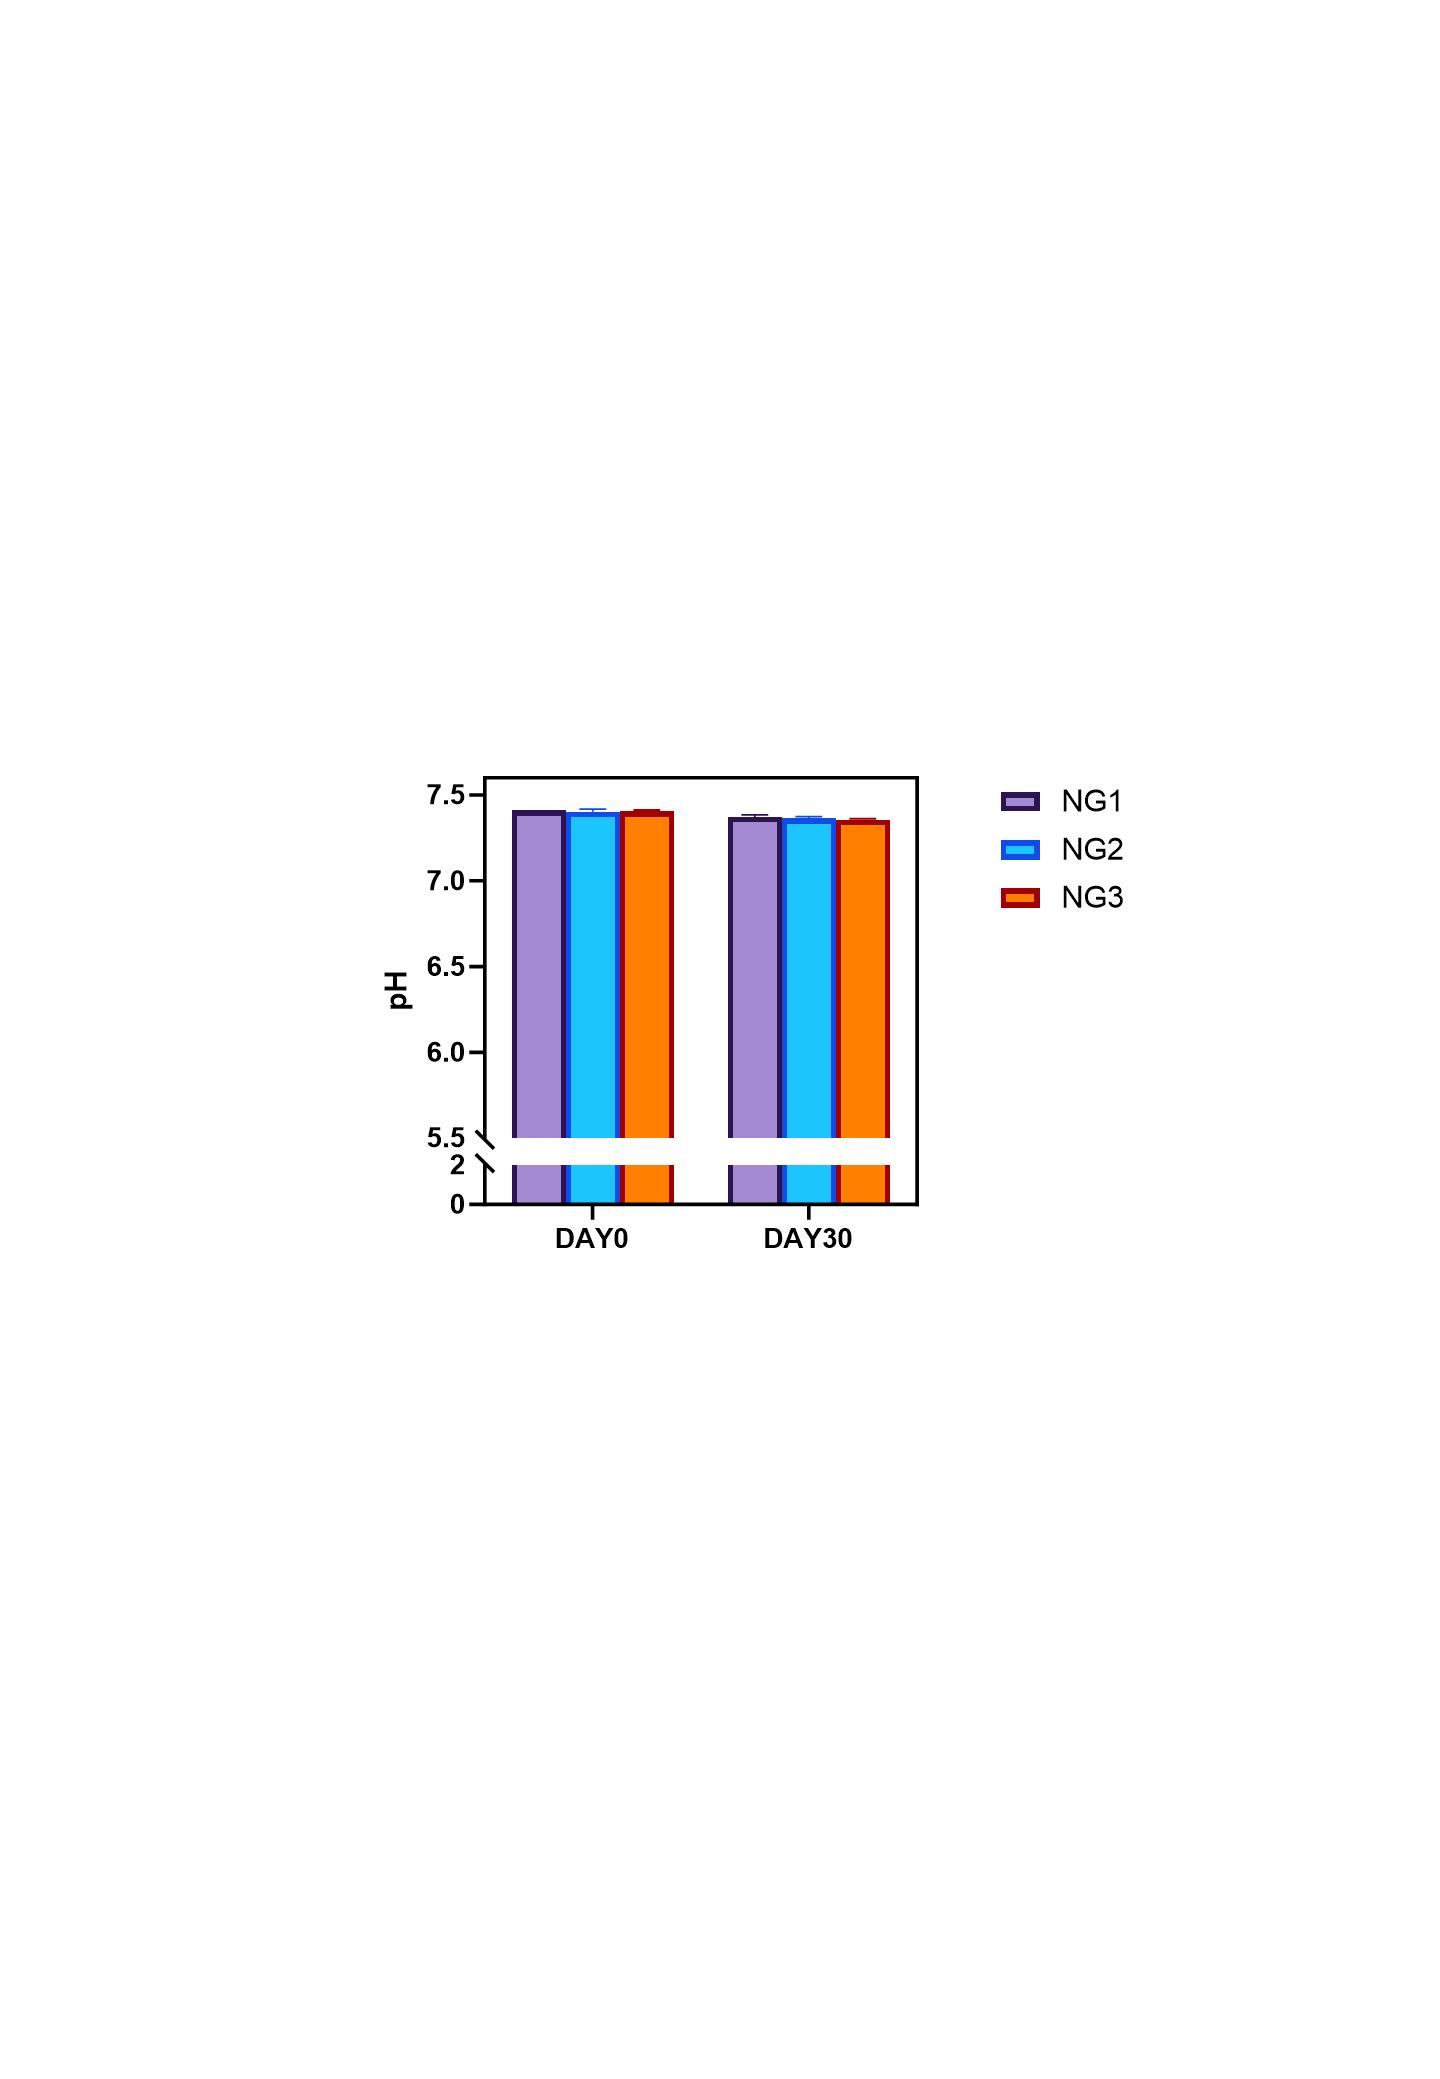


**Figure S8.** pH changes of three CD-nGels before and after hydrolysis in PBS.


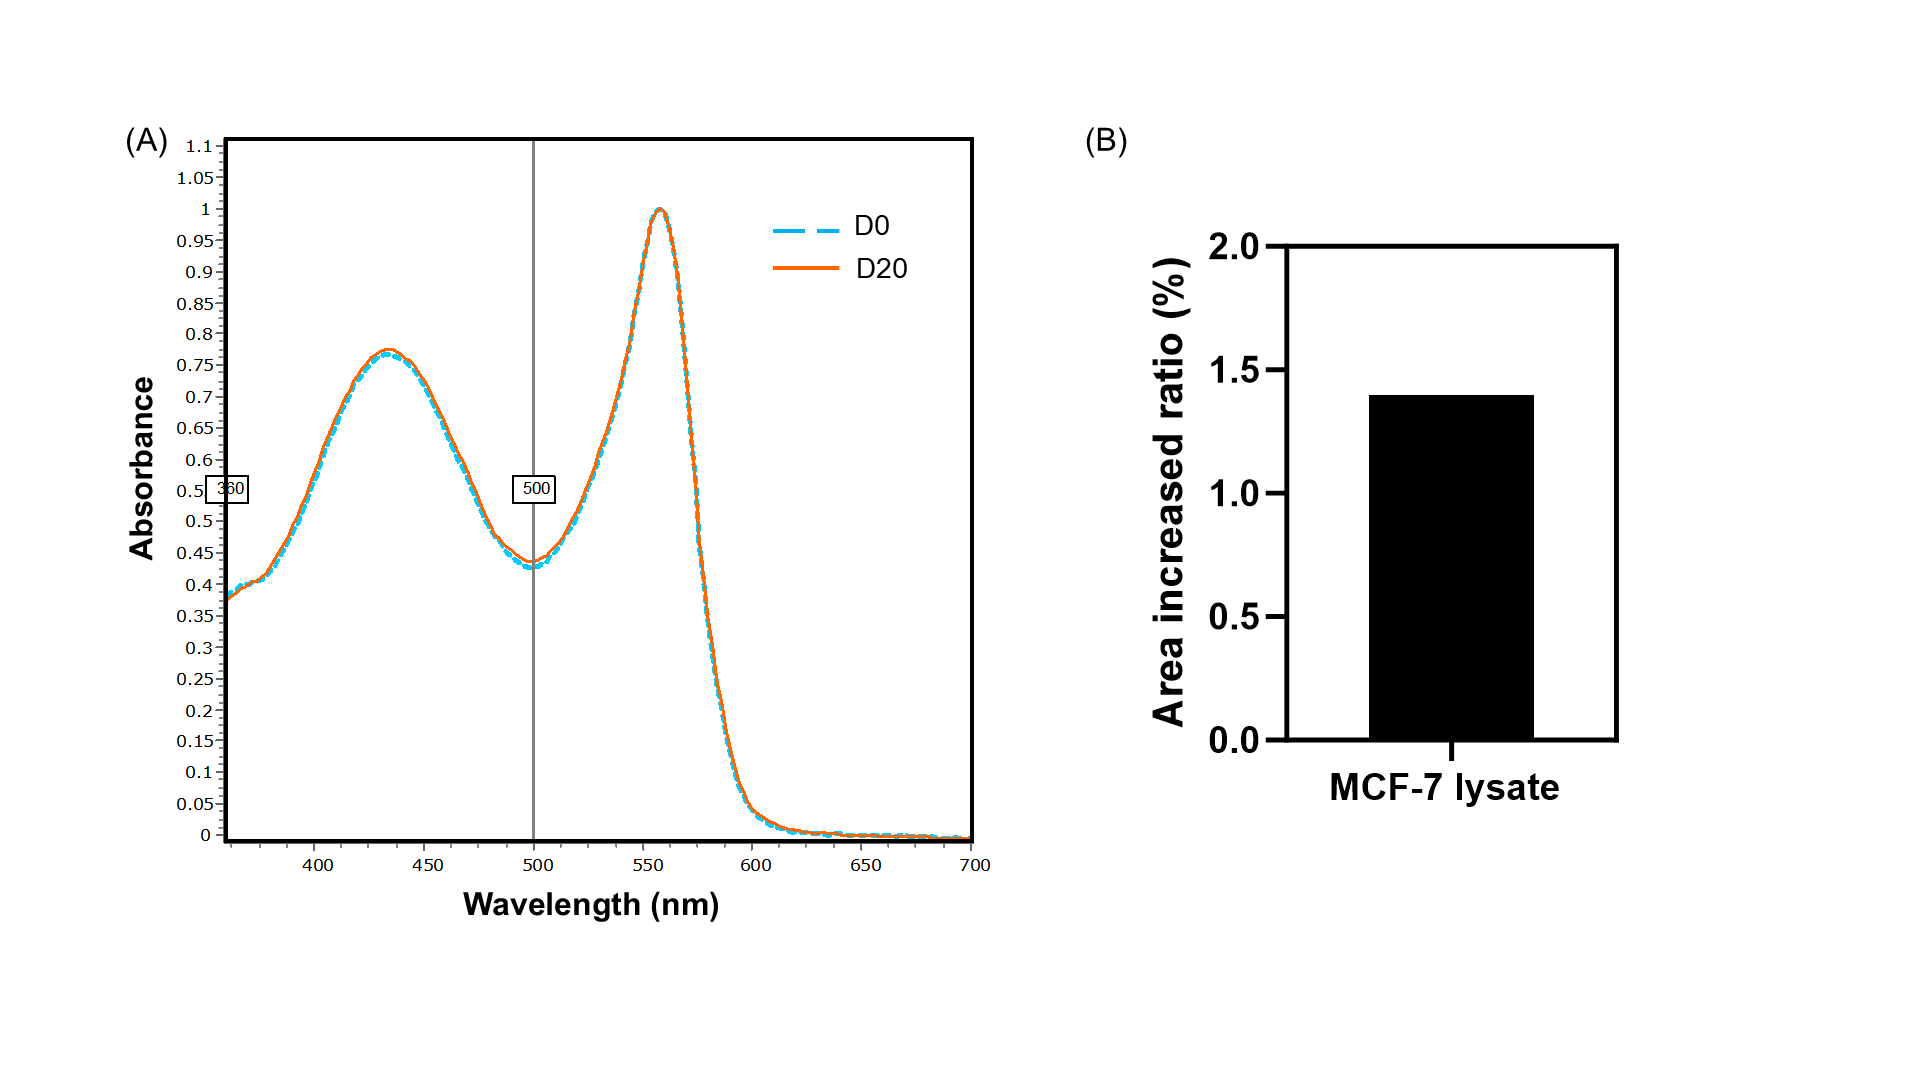


**Figure S9**. MCF-7 lysate control experiment monitored by UV–vis spectroscopy. (A) Normalized spectra of MCF-7 lysate with phenol red in the absence of CD-nGels. Dashed lines represent the initial spectra at Day 0 (D0), while solid lines correspond to spectra collected at Day 20 (D20). (B) The relative area increases in the 430 nm peak region (360-500 nm range, normalized to the 560 nm reference band) is summarized as bar graph.


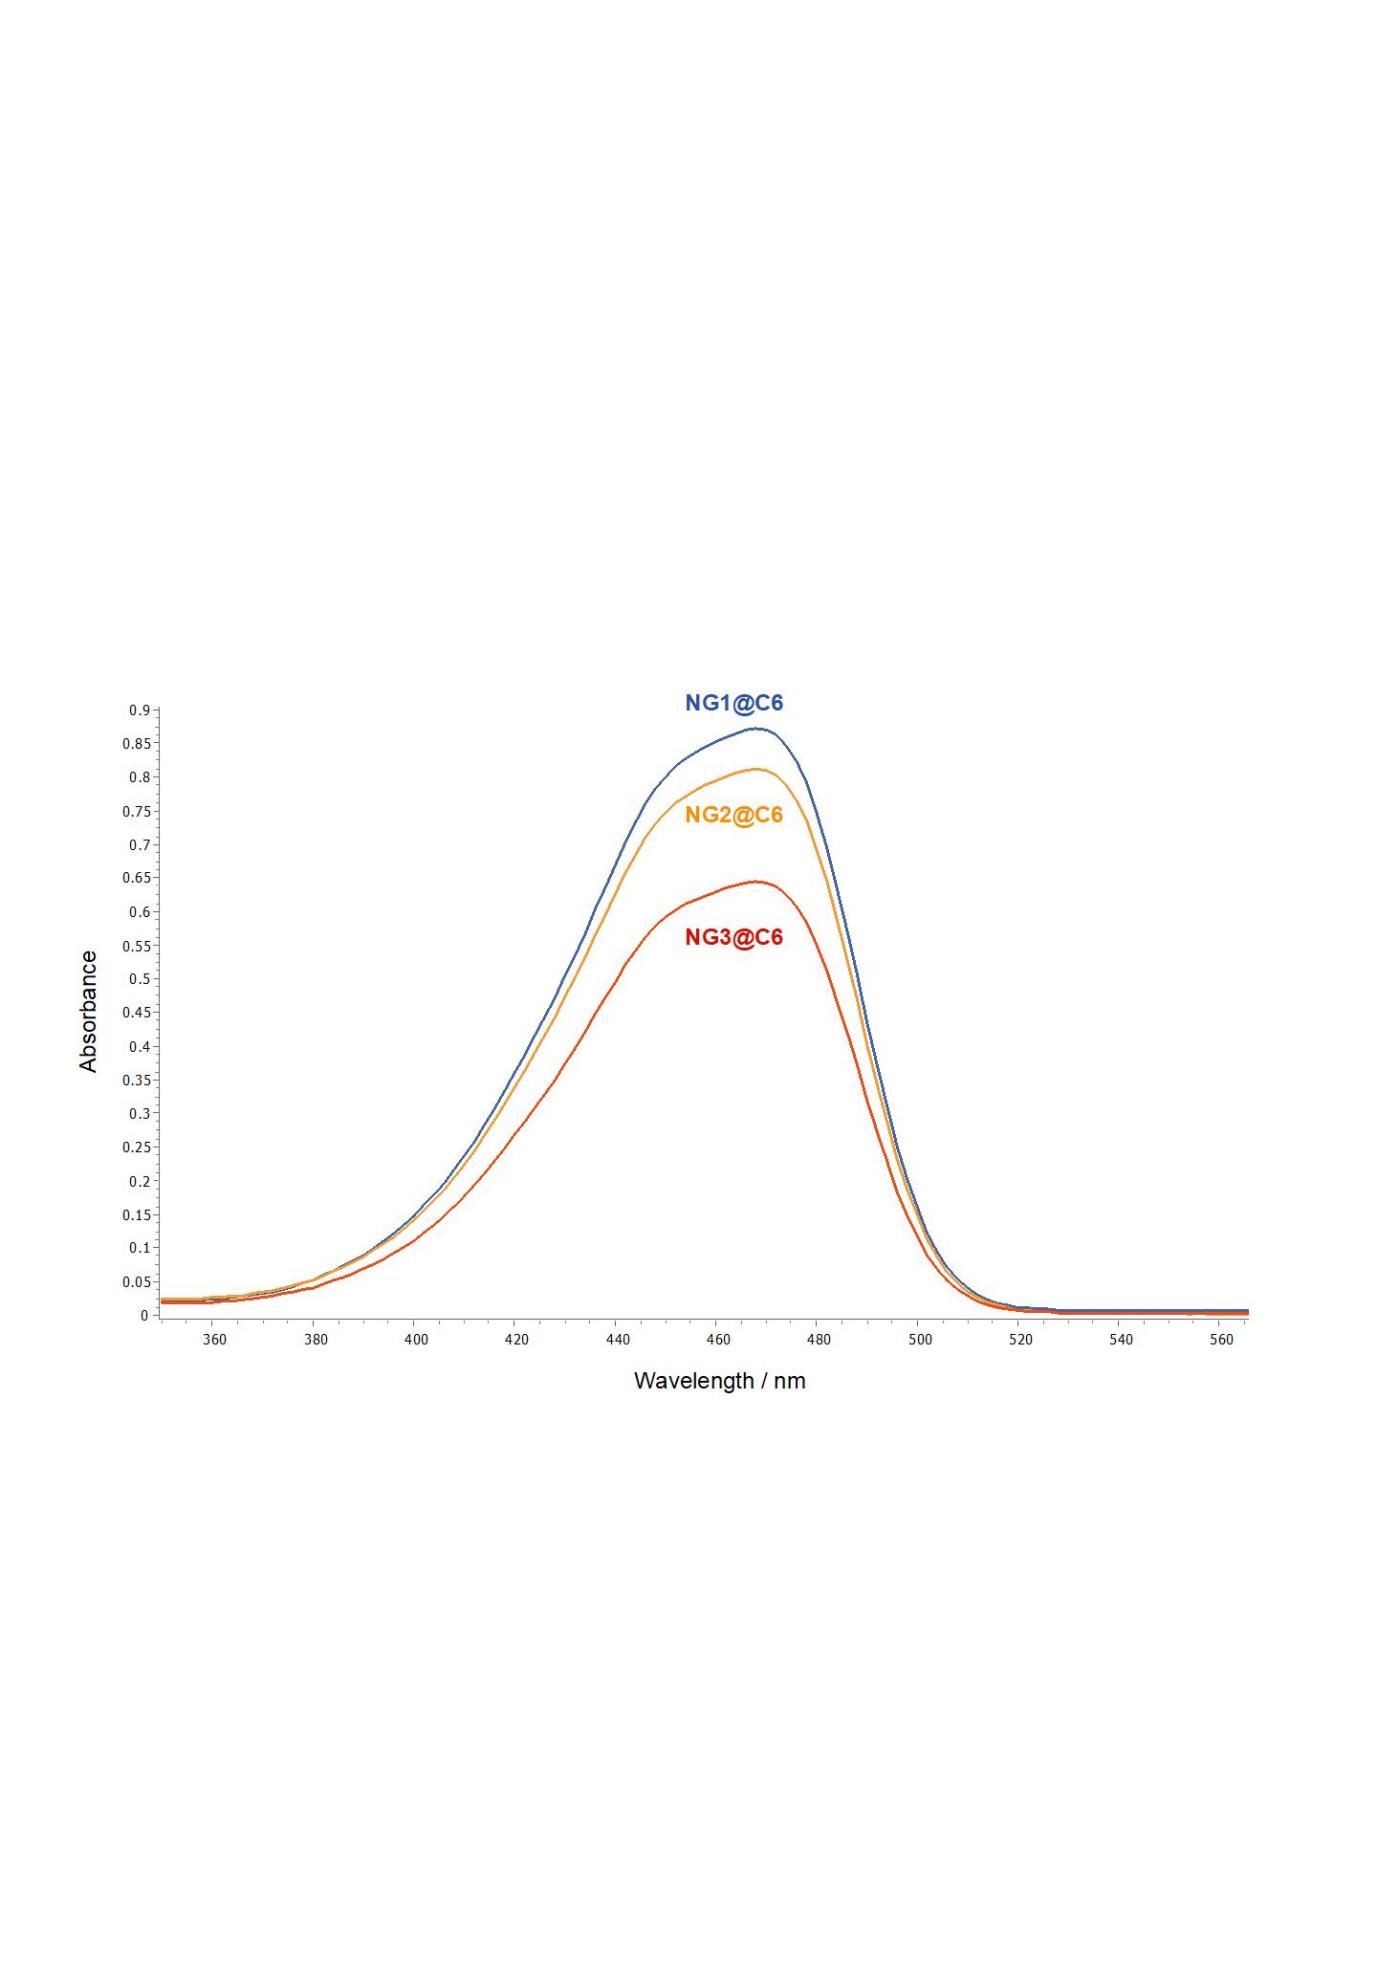


**Figure S10.** UV-vis spectra of CD-nGels@C6 dispersed in DMSO.
